# Supplementary material for: Self-esteem and stress: a structural equation modelling of biosocial determinants, psychological mediators and anxiety among Malaysian undergraduates
Source: PeerJ journal article supplement (doi:10.7717/peerj.19304), 2025-06-24
Supplement: Codebook.pdf [file Codebook.pdf]

### Codebook for Categorical Data

|    | <b>Categorical Data</b>  | <b>Code</b>                                                                                                                                      |
|----|--------------------------|--------------------------------------------------------------------------------------------------------------------------------------------------|
| 1  | Gender                   | 0 = Male<br>1 = Female                                                                                                                           |
| 2  | Ethnicity                | 0 = India<br>1 = Malay<br>2 = Chinese<br>3 = Others                                                                                              |
| 3  | Physical Activity        | 1 = Inactive , values less than 600<br>2 = Minimally active, values between 600 and 2999<br>3 = HEPA active, values more than 2999               |
| 4  | Smoking                  | 0 = No<br>1 = Yes                                                                                                                                |
| 5  | Alcohol                  | 0 = No<br>1 = Yes                                                                                                                                |
| 6  | Illicit Drug             | 0 = No<br>1 = Yes                                                                                                                                |
| 7  | Problematic Internet Use | 0 = Low, value less than 13<br>1 = High, value of 13 and above                                                                                   |
| 8  | Social Support           | 0 = Low, value less than 30<br>1 = Moderate, value between 30 and 60<br>2 = High, value more than 60                                             |
| 9  | Self-esteem              | 0 = Low, value less 26<br>1 = Moderate, value between 26 and 29<br>2 = High, value more than 30                                                  |
| 10 | Stress                   | 0 = Mild, value less than 14<br>1 = Moderate, value between 14 and 26<br>2 = Severe, value more than 26                                          |
| 11 | Anxiety                  | 0 = Minimal, value between 0 and 4<br>1 = Mild, value between 5 and 9<br>2 = Moderate, value between 10 and 14<br>3 = Severe, value more than 14 |
