# Supplementary material for: Self-esteem and stress: a structural equation modelling of biosocial determinants, psychological mediators and anxiety among Malaysian undergraduates
Source: PeerJ journal article supplement (doi:10.7717/peerj.19304), 2025-06-24
Supplement: SuppTable.pdf [file SuppTable.pdf]

**Table S1 Sub-analysis of problematic internet use, social support and mental health literacy based on domains**

| <b>Social Factors</b>    | <b>Domains</b>                      | <b>Mean (SD)</b> |
|--------------------------|-------------------------------------|------------------|
| Problematic internet use | Control disorder                    | 3.0 (0.8)        |
|                          | Neglect                             | 2.9 (0.8)        |
|                          | Obsession                           | 2.6 (0.9)        |
| Social Support           | Family                              | 5.0 (1.3)        |
|                          | Friends                             | 4.9 (1.2)        |
|                          | Significant other                   | 5.1 (1.4)        |
| Mental health literacy   | Knowledge of mental health problems | 4.1 (0.7)*       |
|                          | Erroneous belief                    | 4.6 (1.0)*       |
|                          | Help-seeking and first aid skills   | 4.0 (1.0)*       |
|                          | Self-help strategies                | 4.5 (1.0)*       |

Note: SD = Standard deviation; \*Median (IQR)

**Table S2 Sub-analysis of social support based on year of study**

| <b>Year of study</b> | <b>Mean (SD)</b> | <b>ANOVA Test</b> |                |
|----------------------|------------------|-------------------|----------------|
|                      |                  | <b>F value</b>    | <b>p-value</b> |
| Year 1               | 59.2 (1.4)       | 2.524             | 0.039*         |
| Year 2               | 60.4 (1.5)       |                   |                |
| Year 3               | 61.4 (1.5)       |                   |                |
| Year 4               | 62.3 (1.5)       |                   |                |
| Year 5               | 63.2 (1.6)       |                   |                |

\*Post hoc analysis: Year 1 undergraduates scored significantly lower than year 4 undergraduates (p=0.007).

**Table S3 Sub-analysis of mental health literacy**

| <b>Item</b>      | <b>Question</b>                                                                              | <b>Mean (SD)</b> |
|------------------|----------------------------------------------------------------------------------------------|------------------|
| <b>Knowledge</b> |                                                                                              | 4.25 (0.5)       |
| MHL7             | Changes in brain function may lead to the onset of mental disorders                          | 3.99 (0.8)       |
| MHL10            | One of the symptoms of depression is the loss of interest or pleasure in most things         | 4.42 (0.6)       |
| MHL11            | The symptoms' length is one of the important criteria for the diagnosis of a mental disorder | 4.13 (0.7)       |
| MHL12            | Mental disorders affect people's thoughts                                                    | 4.41 (0.7)       |
| MHL14            | A person with schizophrenia may see and hear things that nobody else sees and hears          | 4.14 (0.8)       |
| MHL15            | Highly stressful situations may cause mental disorders                                       | 4.43 (0.6)       |

|                         |                                                                                               |            |
|-------------------------|-----------------------------------------------------------------------------------------------|------------|
| <b>Erroneous Belief</b> |                                                                                               | 4.40 (0.6) |
| MHL2R                   | Mental disorders don't affect people's behaviors                                              | 4.29 (0.9) |
| MHL5R                   | Mental disorders don't affect people's feelings                                               | 4.42 (0.8) |
| MHL6R                   | Only adults have mental disorders                                                             | 4.51 (0.7) |
| <b>Help Seeking</b>     |                                                                                               | 4.04 (0.7) |
| MHL4                    | If I had a mental disorder, I would seek for a psychologist's help                            | 3.87 (0.9) |
| MHL8                    | If someone close to me had a mental disorder, I would encourage her/him to see a psychiatrist | 4.23 (0.7) |
| MHL16                   | If I had a mental disorder, I would seek for a psychiatrist's help                            | 4.03 (0.9) |
| <b>Self-Help</b>        |                                                                                               | 4.45 (0.5) |
| MHL1                    | Physical exercise contributes to a good mental health                                         | 4.50 (0.6) |
| MHL3                    | Sleeping well contributes to a good mental health                                             | 4.53 (0.6) |
| MHL9                    | A balanced diet contributes to a good mental health                                           | 4.33 (0.7) |
| MHL13                   | Doing something enjoyable contributes to a good mental health                                 | 4.47 (0.6) |
